# Supplementary material for: First-principles calculations to investigate the effects of strain, electric field, and atom impurity on the electronic and magnetic properties of RuX2 (X = S, Se) nanosheets
Source: Royal Society of Chemistry journal article supplement (doi:10.1039/d1cp01968f), 2021-01-01
Supplement: d1cp01968f1.pdf [file d1cp01968f1.pdf]

## First-principles calculations to investigate strain, electric field, and atom impurities effects on the electronic and magnetic properties of $RuX_2$ ( $X = S, Se$ ) nanosheets

Yusuf Zuntu Abdullahi<sup>a</sup>, Sohail Ahmad<sup>b</sup>

<sup>a</sup>Department of Physics, Faculty of Science, Kaduna State University, P.M.B. 2339 Kaduna State, Nigeria.

<sup>b</sup>Department of Physics, College of Science, P O Box 9004, King Khalid University, Abha, Saudi Arabia.

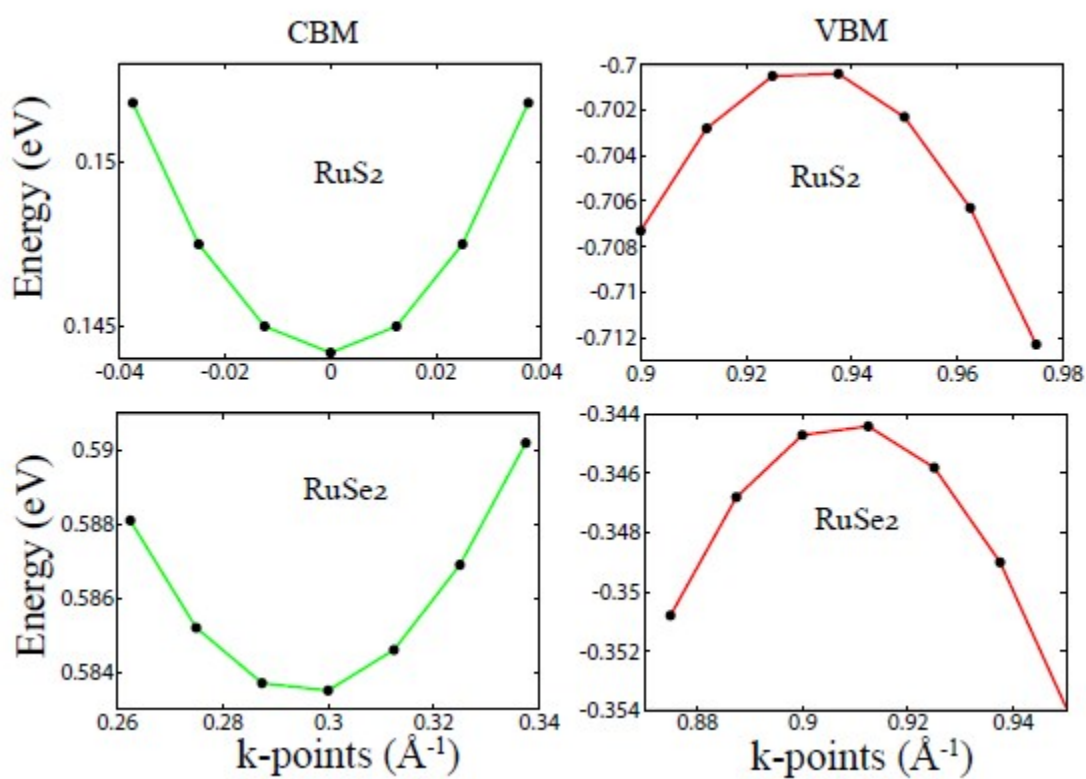

**Fig. S1** The E-k points closed to the CBM and VBM plots for  $T' - RuX_2$  sheets.

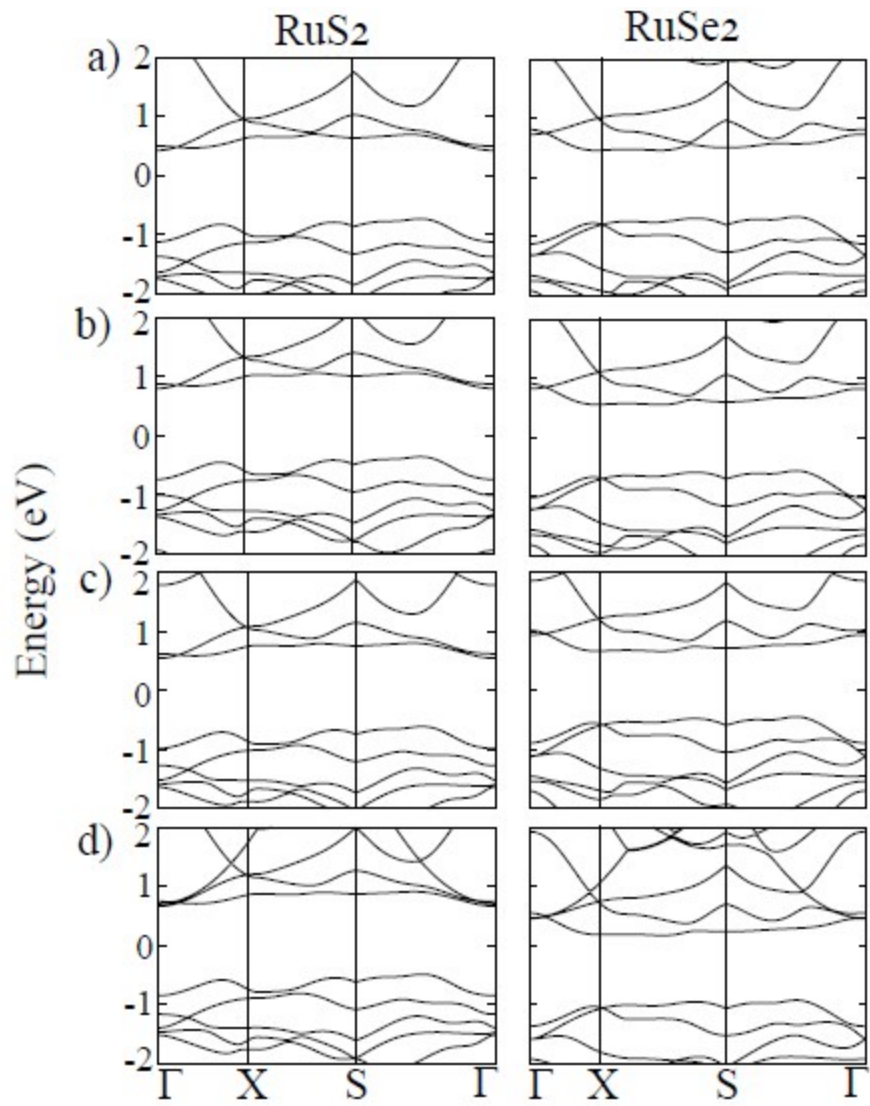

**Fig. S2** The band structure for the  $T' - RuX_2$  sheets with electric field of magnitude (a) 2 (b) 4 (c) 6 (d) 8 V/nm.

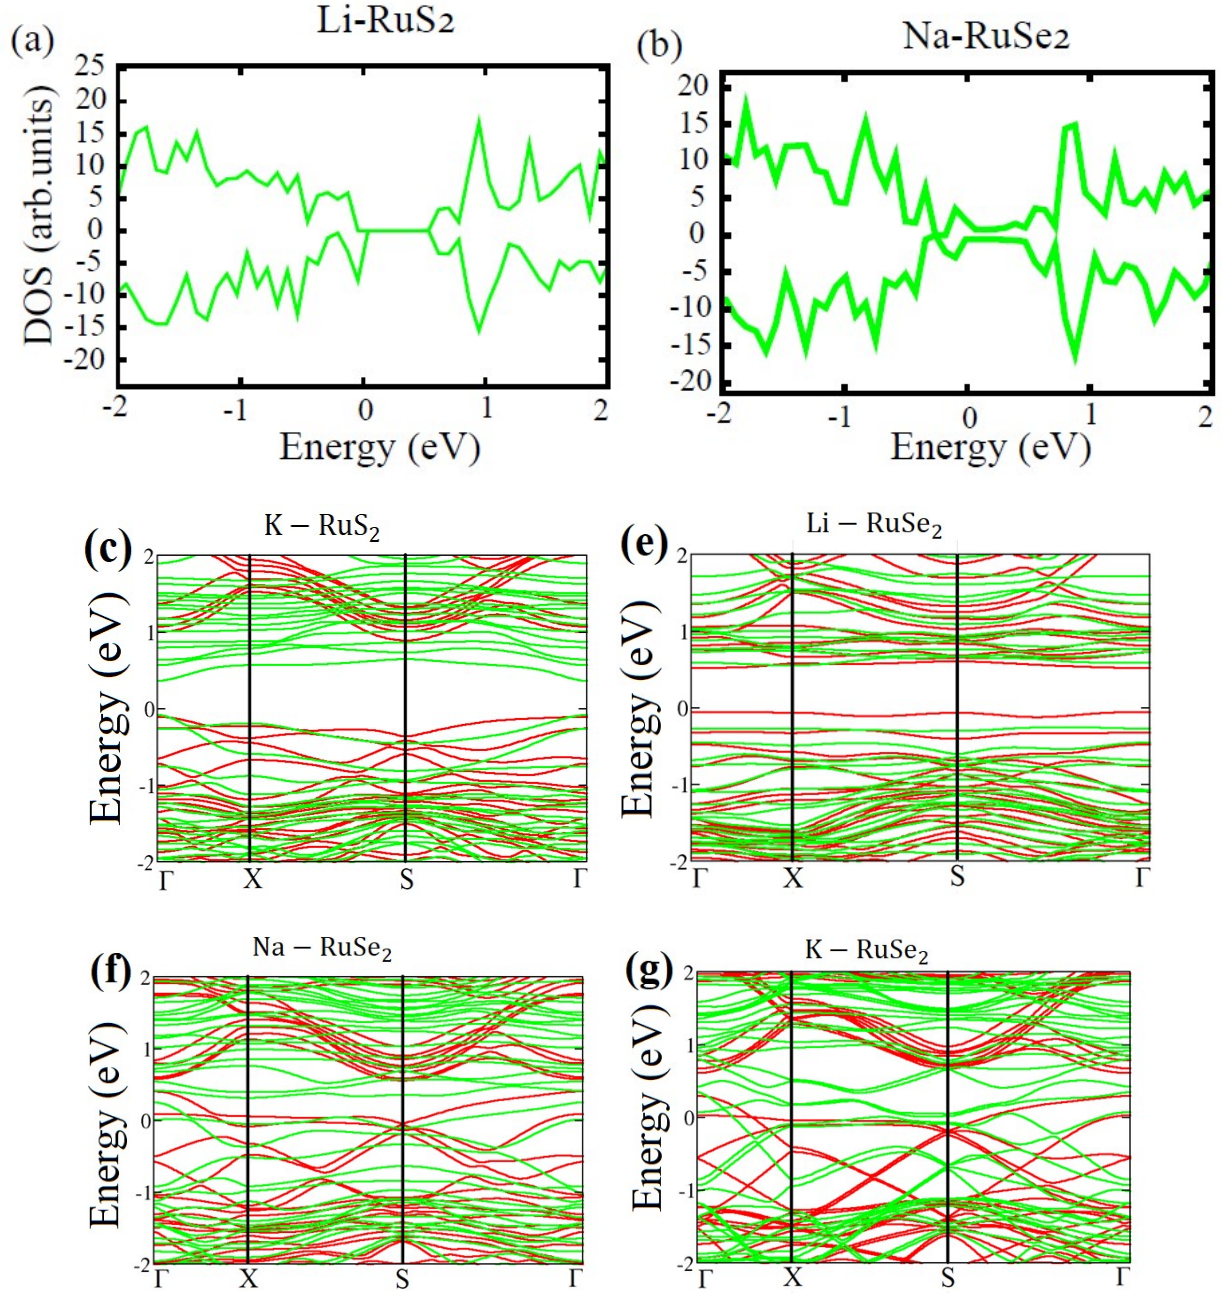

**Fig. S3** Spin-polarized DOS and band structures for the (a)-(c)  $T' - RuS_2$  (a)-(c) and (d)-(f)  $T' - RuSe_2$  with adsorbed  $Li$ ,  $Na$ ,  $K$  atoms. Red and green color represent spin-up and spin-down bands.

**Table S1:** The calculated carrier effective mass ( $m^*$ ) for  $T' - RuX_2$  sheets.

| Sheet   | Carrier | $m^*/m_0$ |
|---------|---------|-----------|
| $RuS_2$ | $e$     | 27.7268   |
|         | $h$     | 22.4335   |

|          |     |         |
|----------|-----|---------|
| $RuSe_2$ | $e$ | 37.5317 |
|          | $h$ | 26.5343 |

**Table S2:** Relative adsorption energy in eV for Li, Na and K atoms on the  $T_{Ru}$ ,  $T_{X1}$ ,  $T_{X2}$  ( $X = S, Se$ ) and  $T_{bri}$  adsorption sites (Ads. Site). The adsorption sites are indicated in Fig. 1.

| Sheet    | Atoms | $E_{T_{Ru}} - E_{T_{X2}}$ | $E_{T_{X1}} - E_{T_{X2}}$ | $E_{T_{bri}} - E_{T_{X2}}$ | Ads. Site |
|----------|-------|---------------------------|---------------------------|----------------------------|-----------|
| $RuS_2$  | Li    | -1.2947                   | 0.0959                    | 0.1955                     | $T_{Ru}$  |
|          | Na    | -0.8963                   | 0.0146                    | 0.0748                     | $T_{Ru}$  |
|          | K     | 0.1466                    | 0.4210                    | 0.5569                     | $T_{X2}$  |
| $RuSe_2$ | Li    | -0.0182                   | 0.4199                    | 0.6108                     | $T_{Ru}$  |
|          | Na    | 1.6086                    | 0.4887                    | 0.7211                     | $T_{X2}$  |
|          | K     | 0.2526                    | 0.7289                    | 0.9286                     | $T_{X2}$  |

**Table S3:** Relative energies in eV between FM and AFM for  $T' - RuX_2$  sheets with adsorbed Li, Na and K atoms.

| Sheet    | Atoms | $E_{AFM} - E_{FM}$ | Magnetic Ordering |
|----------|-------|--------------------|-------------------|
| $RuS_2$  | Li    | -0.0570            | AFM               |
|          | Na    | -0.1771            | AFM               |
|          | K     | 0.0535             | FM                |
| $RuSe_2$ | Li    | 0.0286             | FM                |
|          | Na    | 0.0557             | FM                |
|          | K     | 0.1433             | FM                |
